# Supplementary material for: Epithelial to Mesenchymal Transition Relevant Subtypes with Distinct Prognosis and Responses to Chemo- or Immunotherapies in Osteosarcoma
Source: Hindawi journal article supplement (doi:10.1155/2022/1377565), 2022-07-04

Cluster A B

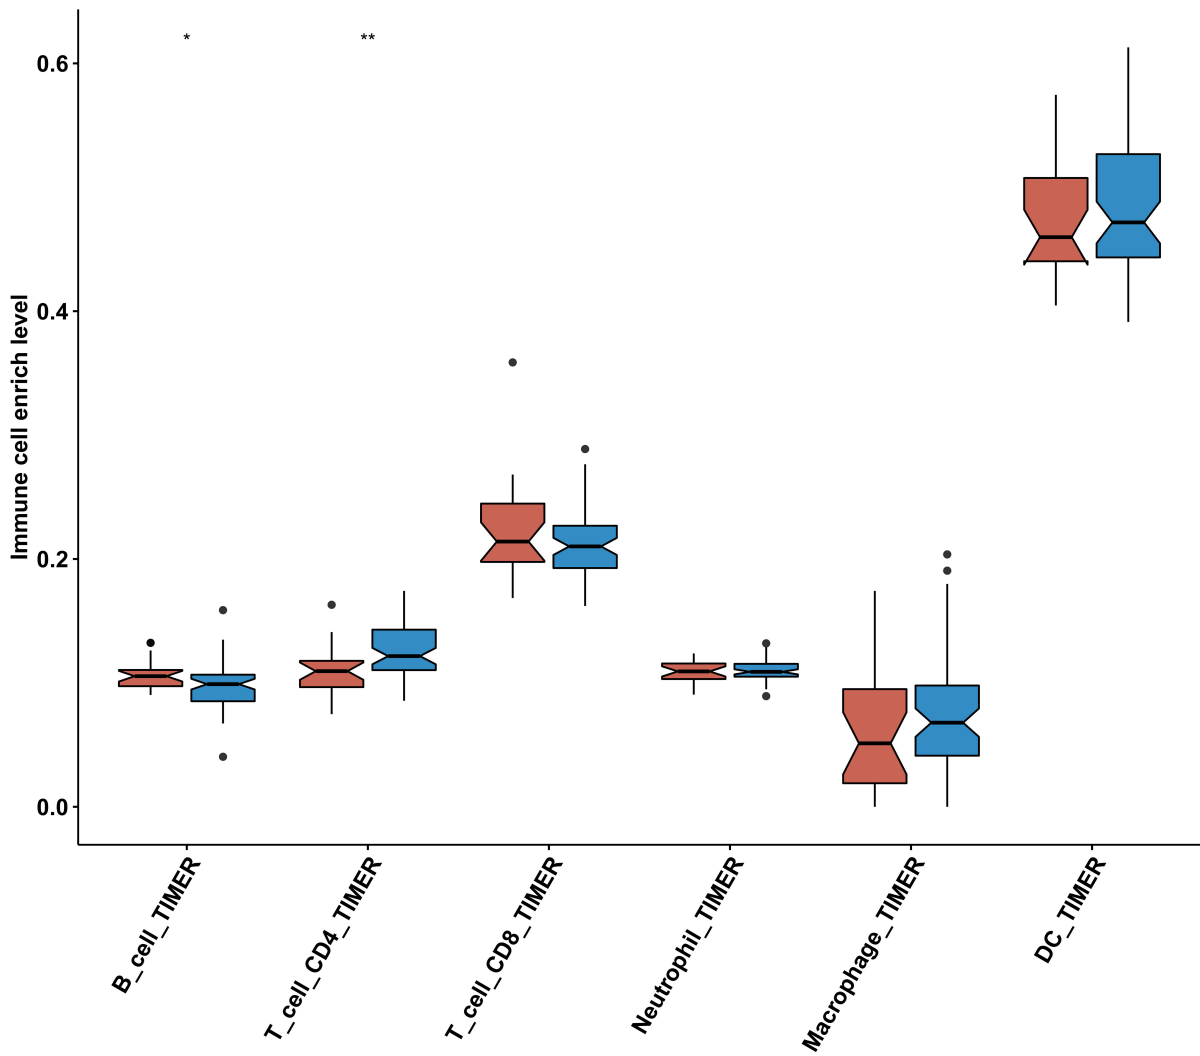

Supplement: f1 [file 1377565.f1.pdf]
