# Supplementary material for: Epithelial to Mesenchymal Transition Relevant Subtypes with Distinct Prognosis and Responses to Chemo- or Immunotherapies in Osteosarcoma
Source: Hindawi journal article supplement (doi:10.1155/2022/1377565), 2022-07-04
Supplement: f3 [file 1377565.f3.pdf]

Supplementary table 2. The gene set of each step within the cancer immunity cycle.

| GeneSymbol | Steps | Direction | ImmuneCellType |
|------------|-------|-----------|----------------|
| IL10       | 1     | positive  | Multiple       |
| TGFB1      | 1     | positive  | Multiple       |
| HMGB1      | 1     | positive  | Multiple       |
| ANXA1      | 1     | positive  | Multiple       |
| CALR       | 1     | positive  | Multiple       |
| CXCL10     | 1     | positive  | Multiple       |
| PDIA3      | 1     | positive  | Multiple       |
| HSPA1A     | 1     | positive  | Multiple       |
| HSPA1B     | 1     | positive  | Multiple       |
| HSPA2      | 1     | positive  | Multiple       |
| HSPA8      | 1     | positive  | Multiple       |
| HSPA4      | 1     | positive  | Multiple       |
| HSPA14     | 1     | positive  | Multiple       |
| HSPA5      | 1     | positive  | Multiple       |
| HSPA6      | 1     | positive  | Multiple       |
| HSPA9      | 1     | positive  | Multiple       |
| HSPA13     | 1     | positive  | Multiple       |
| HSPA7      | 1     | positive  | Multiple       |
| HSPA8      | 1     | positive  | Multiple       |
| HSPA12A    | 1     | positive  | Multiple       |
| HSPA12B    | 1     | positive  | Multiple       |
| HSP90AA1   | 1     | positive  | Multiple       |
| HSP90AB1   | 1     | positive  | Multiple       |
| HSP90B1    | 1     | positive  | Multiple       |
| IFNA2      | 1     | positive  | Multiple       |
| IFNA1      | 1     | positive  | Multiple       |
| IFNA13     | 1     | positive  | Multiple       |
| IFNA6      | 1     | positive  | Multiple       |
| IFNA21     | 1     | positive  | Multiple       |
| IFNA4      | 1     | positive  | Multiple       |
| IFNA8      | 1     | positive  | Multiple       |
| IFNA5      | 1     | positive  | Multiple       |
| IFNA7      | 1     | positive  | Multiple       |
| IFNA14     | 1     | positive  | Multiple       |
| IFNA16     | 1     | positive  | Multiple       |
| IFNA10     | 1     | positive  | Multiple       |
| IFNA17     | 1     | positive  | Multiple       |
| IFNB1      | 1     | positive  | Multiple       |
| IFNE       | 1     | positive  | Multiple       |
| IFNW1      | 1     | positive  | Multiple       |
| TNF        | 2     | positive  | Multiple       |
| IL1A       | 2     | positive  | Multiple       |
| IL1B       | 2     | positive  | Multiple       |
| IFNA2      | 2     | positive  | Multiple       |
| IFNA1      | 2     | positive  | Multiple       |
| IFNA13     | 2     | positive  | Multiple       |
| IFNA6      | 2     | positive  | Multiple       |
| IFNA21     | 2     | positive  | Multiple       |
| IFNA4      | 2     | positive  | Multiple       |

|          |   |          |          |
|----------|---|----------|----------|
| IFNA8    | 2 | positive | Multiple |
| IFNA5    | 2 | positive | Multiple |
| IFNA7    | 2 | positive | Multiple |
| IFNA14   | 2 | positive | Multiple |
| IFNA16   | 2 | positive | Multiple |
| IFNA10   | 2 | positive | Multiple |
| IFNA17   | 2 | positive | Multiple |
| CD40LG   | 2 | positive | Multiple |
| CD40     | 2 | positive | Multiple |
| NT5C     | 2 | positive | Multiple |
| HMGB1    | 2 | positive | Multiple |
| TLR1     | 2 | positive | Multiple |
| TLR2     | 2 | positive | Multiple |
| TLR3     | 2 | positive | Multiple |
| TLR4     | 2 | positive | Multiple |
| TLR5     | 2 | positive | Multiple |
| TLR6     | 2 | positive | Multiple |
| TLR7     | 2 | positive | Multiple |
| TLR8     | 2 | positive | Multiple |
| TLR9     | 2 | positive | Multiple |
| TLR10    | 2 | positive | Multiple |
| HLAA     | 2 | positive | Multiple |
| B2M      | 2 | positive | Multiple |
| TAP1     | 2 | positive | Multiple |
| IL10     | 2 | negative | Multiple |
| IL4      | 2 | negative | Multiple |
| IL13     | 2 | negative | Multiple |
| CD3D     | 3 | positive | Multiple |
| CD3E     | 3 | positive | Multiple |
| CD3G     | 3 | positive | Multiple |
| CD247    | 3 | positive | Multiple |
| CD28     | 3 | positive | Multiple |
| TNFRSF9  | 3 | positive | Multiple |
| TNFSF9   | 3 | positive | Multiple |
| TNFRSF4  | 3 | positive | Multiple |
| TNFSF4   | 3 | positive | Multiple |
| CD27     | 3 | positive | Multiple |
| CD70     | 3 | positive | Multiple |
| TNFRSF14 | 3 | positive | Multiple |
| TNFSF14  | 3 | positive | Multiple |
| CD40     | 3 | positive | Multiple |
| CD40LG   | 3 | positive | Multiple |
| TNFRSF18 | 3 | positive | Multiple |
| TNFSF18  | 3 | positive | Multiple |
| TNFRSF25 | 3 | positive | Multiple |
| TNFSF15  | 3 | positive | Multiple |
| TNFRSF8  | 3 | positive | Multiple |
| TNFSF8   | 3 | positive | Multiple |
| HAVCR1   | 3 | positive | Multiple |
| TIMD4    | 3 | positive | Multiple |
| SLAMF7   | 3 | positive | Multiple |
| SLAMF6   | 3 | positive | Multiple |
| SLAMF1   | 3 | positive | Multiple |

|          |   |          |                |
|----------|---|----------|----------------|
| SLAMF9   | 3 | positive | Multiple       |
| SLAMF8   | 3 | positive | Multiple       |
| CD2      | 3 | positive | Multiple       |
| CD48     | 3 | positive | Multiple       |
| CD58     | 3 | positive | Multiple       |
| CD226    | 3 | positive | Multiple       |
| ICOS     | 3 | positive | Multiple       |
| ICOSLG   | 3 | positive | Multiple       |
| KLRK1    | 3 | positive | Multiple       |
| MICA     | 3 | positive | Multiple       |
| MICB     | 3 | positive | Multiple       |
| RAET1E   | 3 | positive | Multiple       |
| RAET1G   | 3 | positive | Multiple       |
| CRTAM    | 3 | positive | Multiple       |
| CADM1    | 3 | positive | Multiple       |
| CTLA4    | 3 | negative | Multiple       |
| PDCD1    | 3 | negative | Multiple       |
| PDCD1LG2 | 3 | negative | Multiple       |
| CD274    | 3 | negative | Multiple       |
| CD160    | 3 | negative | Multiple       |
| TNFRSF14 | 3 | negative | Multiple       |
| BTLA     | 3 | negative | Multiple       |
| VSIR     | 3 | negative | Multiple       |
| LAIR1    | 3 | negative | Multiple       |
| HAVCR1   | 3 | negative | Multiple       |
| HAVCR2   | 3 | negative | Multiple       |
| LGALS9   | 3 | negative | Multiple       |
| TIMD4    | 3 | negative | Multiple       |
| CD244    | 3 | negative | Multiple       |
| CD48     | 3 | negative | Multiple       |
| TIGIT    | 3 | negative | Multiple       |
| NECTIN3  | 3 | negative | Multiple       |
| LAG3     | 3 | negative | Multiple       |
| IL2      | 3 | positive | Multiple       |
| IL12A    | 3 | positive | Multiple       |
| IL12B    | 3 | positive | Multiple       |
| CXCR5    | 4 | positive | B cell         |
| CXCL13   | 4 | positive | B cell         |
| CCL24    | 4 | positive | Basophil       |
| CCL26    | 4 | positive | Basophil       |
| CCL19    | 4 | positive | CD4 T cell     |
| CX3CL1   | 4 | positive | CD4 T cell     |
| CXCL16   | 4 | positive | CD4 T cell     |
| CCR5     | 4 | positive | CD8 T cell     |
| CXCR3    | 4 | positive | CD8 T cell     |
| CXCL10   | 4 | positive | CD8 T cell     |
| CXCL9    | 4 | positive | CD8 T cell     |
| CCL20    | 4 | positive | CD8 T cell     |
| CXCL11   | 4 | positive | CD8 T cell     |
| CX3CL1   | 4 | positive | CD8 T cell     |
| CXCL16   | 4 | positive | CD8 T cell     |
| CCR7     | 4 | positive | Dendritic cell |
| CCL3     | 4 | positive | Dendritic cell |

|        |   |          |                |
|--------|---|----------|----------------|
| CCL4   | 4 | positive | Dendritic cell |
| CCL5   | 4 | positive | Dendritic cell |
| CCL21  | 4 | positive | Dendritic cell |
| CCL11  | 4 | positive | Eosinophil     |
| CCL24  | 4 | positive | Eosinophil     |
| CCL26  | 4 | positive | Eosinophil     |
| CSF1   | 4 | positive | Macrophage     |
| CCL2   | 4 | positive | Macrophage     |
| CCL3   | 4 | positive | Macrophage     |
| CCL4   | 4 | positive | Macrophage     |
| CCL5   | 4 | positive | Macrophage     |
| CXCR2  | 4 | positive | MDSC           |
| CXCL5  | 4 | positive | MDSC           |
| CCL2   | 4 | positive | Monocyte       |
| CCL7   | 4 | positive | Monocyte       |
| CX3CL1 | 4 | positive | Monocyte       |
| CXCL1  | 4 | positive | Neutrophil     |
| CXCL2  | 4 | positive | Neutrophil     |
| CXCL3  | 4 | positive | Neutrophil     |
| CXCL8  | 4 | positive | Neutrophil     |
| CXCL6  | 4 | positive | Neutrophil     |
| CXCL5  | 4 | positive | Neutrophil     |
| CXCR3  | 4 | positive | NK cell        |
| CXCL10 | 4 | positive | NK cell        |
| CXCL9  | 4 | positive | NK cell        |
| CCL3   | 4 | positive | NK cell        |
| CCL4   | 4 | positive | NK cell        |
| CCL5   | 4 | positive | NK cell        |
| CXCL11 | 4 | positive | NK cell        |
| CX3CL1 | 4 | positive | NK cell        |
| CXCR5  | 4 | positive | T cell         |
| CCR7   | 4 | positive | T cell         |
| CXCL9  | 4 | positive | T cell         |
| CCL3   | 4 | positive | T cell         |
| CCL4   | 4 | positive | T cell         |
| CCL5   | 4 | positive | T cell         |
| CCL19  | 4 | positive | T cell         |
| CCL21  | 4 | positive | T cell         |
| CX3CL1 | 4 | positive | T cell         |
| CXCL13 | 4 | positive | T cell         |
| CXCR3  | 4 | positive | TH1 cell       |
| CXCL10 | 4 | positive | TH1 cell       |
| CXCL9  | 4 | positive | TH1 cell       |
| CXCL11 | 4 | positive | TH1 cell       |
| CCR6   | 4 | positive | TH17 cell      |
| CCL20  | 4 | positive | TH17 cell      |
| CXCL12 | 4 | positive | TH17 cell      |
| CXCR4  | 4 | positive | TH17 cell      |
| CCL1   | 4 | positive | Th2 cell       |
| CCL17  | 4 | positive | Th2 cell       |
| CCL22  | 4 | positive | Th2 cell       |
| CCR6   | 4 | positive | TH22 cell      |
| CCL20  | 4 | positive | TH22 cell      |

|          |   |          |           |
|----------|---|----------|-----------|
| CCR4     | 4 | positive | Treg cell |
| CCR10    | 4 | positive | Treg cell |
| CCL1     | 4 | positive | Treg cell |
| CCL17    | 4 | positive | Treg cell |
| CCL22    | 4 | positive | Treg cell |
| CCL28    | 4 | positive | Treg cell |
| STAT1    | 5 | positive | T cell    |
| IRF5     | 5 | positive | T cell    |
| KLF2     | 5 | positive | T cell    |
| ITGB2    | 5 | positive | T cell    |
| ICAM1    | 5 | negative | T cell    |
| EZH2     | 5 | negative | T cell    |
| DNMT1    | 5 | negative | T cell    |
| VEGFA    | 5 | negative | T cell    |
| EDNRB    | 5 | negative | T cell    |
| CD28     | 6 | positive | Multiple  |
| ICOS     | 6 | positive | Multiple  |
| ICOSLG   | 6 | positive | Multiple  |
| TNFRSF9  | 6 | positive | Multiple  |
| TNFSF9   | 6 | positive | Multiple  |
| CD27     | 6 | positive | Multiple  |
| CD70     | 6 | positive | Multiple  |
| TNFRSF4  | 6 | positive | Multiple  |
| TNFSF4   | 6 | positive | Multiple  |
| TNFSF14  | 6 | positive | Multiple  |
| CD40     | 6 | positive | Multiple  |
| CD40LG   | 6 | positive | Multiple  |
| HLAA     | 6 | positive | Multiple  |
| B2M      | 6 | positive | Multiple  |
| TAP1     | 6 | positive | Multiple  |
| BIRC5    | 6 | positive | Multiple  |
| MDM2     | 6 | positive | Multiple  |
| MAGEA4   | 6 | positive | Multiple  |
| TP53     | 6 | positive | Multiple  |
| PDCD1    | 6 | negative | Multiple  |
| PDCD1LG2 | 6 | negative | Multiple  |
| CD274    | 6 | negative | Multiple  |
| CTLA4    | 6 | negative | Multiple  |
| BTLA     | 6 | negative | Multiple  |
| VTCN1    | 6 | negative | Multiple  |
| IFNG     | 7 | positive | Multiple  |
| GZMB     | 7 | positive | Multiple  |
| PRF1     | 7 | positive | Multiple  |
| PDCD1    | 7 | negative | Multiple  |
| SMC3     | 7 | negative | Multiple  |
| VTCN1    | 7 | negative | Multiple  |
| HAVCR2   | 7 | negative | Multiple  |
| MICA     | 7 | negative | Multiple  |
| MICB     | 7 | negative | Multiple  |
| BTLA     | 7 | negative | Multiple  |
| VSIR     | 7 | negative | Multiple  |
| LAG3     | 7 | negative | Multiple  |
| IDO1     | 7 | negative | Multiple  |

|        |   |          |          |
|--------|---|----------|----------|
| IDO2   | 7 | negative | Multiple |
| ARG1   | 7 | negative | Multiple |
| ARG2   | 7 | negative | Multiple |
| NOS1   | 7 | negative | Multiple |
| NOS2   | 7 | negative | Multiple |
| NOS3   | 7 | negative | Multiple |
| TGFB1  | 7 | negative | Multiple |
| IL10   | 7 | negative | Multiple |
| CCL28  | 7 | negative | Multiple |
| CXCL12 | 7 | negative | Multiple |
| CCL2   | 7 | negative | Multiple |
| CXCL8  | 7 | negative | Multiple |
