# Supplementary material for: Epithelial to Mesenchymal Transition Relevant Subtypes with Distinct Prognosis and Responses to Chemo- or Immunotherapies in Osteosarcoma
Source: Hindawi journal article supplement (doi:10.1155/2022/1377565), 2022-07-04
Supplement: f4 [file 1377565.f4.pdf]

Supplementary table 3. Comparison of the activity of hallmark pathways in two EMT molecular subtypes.

| Hallmark gene sets                                | logFC    | t        |
|---------------------------------------------------|----------|----------|
| Hallmark EMT                                      | -0.0637  | -7.77035 |
| Hallmark Apical surface                           | -0.07485 | -6.04392 |
| Hallmark Apical junction                          | -0.03249 | -4.89504 |
| Hallmark Bile acid metabolism                     | -0.03967 | -4.06134 |
| Hallmark Heme metabolism                          | -0.0181  | -3.7592  |
| Hallmark Xenobiotic metabolism                    | -0.02485 | -3.57791 |
| Hallmark TNF $\alpha$ signaling via NF $\kappa$ B | -0.02906 | -3.39164 |
| Hallmark Wnt $\beta$ -catenin signaling           | -0.03231 | -3.20319 |
| Hallmark Androgen response                        | -0.01603 | -3.0522  |
| Hallmark Mitotic spindle                          | -0.01056 | -3.04127 |
| Hallmark Peroxisome                               | -0.02229 | -3.01146 |
| Hallmark UV response down                         | -0.02408 | -2.95664 |
| Hallmark KRAS signaling down                      | -0.03154 | -2.80643 |
| Hallmark Oxidative phosphorylation                | 0.008628 | 2.656973 |
| Hallmark IL6 JAK STAT3 signaling                  | -0.02987 | -2.6012  |
| Hallmark Glycolysis                               | -0.01265 | -2.57393 |
| Hallmark KRAS signaling up                        | -0.02708 | -2.53013 |
| Hallmark P53 pathway                              | -0.01196 | -2.4937  |
| Hallmark IL2 STAT5 signaling                      | -0.02007 | -2.38971 |
| Hallmark PI3K AKT mTOR signaling                  | -0.01366 | -2.35272 |
| Hallmark Cholesterol homeostasis                  | 0.015724 | 2.327394 |
| Hallmark Estrogen response early                  | -0.02172 | -2.11634 |
| Hallmark Coagulation                              | -0.02072 | -2.10474 |
| Hallmark Reactive oxygen species pathway          | -0.01676 | -2.10445 |
| Hallmark Apoptosis                                | -0.01727 | -2.01012 |
| Hallmark Angiogenesis                             | -0.02374 | -1.92329 |
| Hallmark mTORC1 signaling                         | 0.006016 | 1.923159 |
| Hallmark Pancreas beta cells                      | -0.03178 | -1.7939  |
| Hallmark Interferon alpha response                | -0.02132 | -1.78705 |
| Hallmark Hypoxia                                  | -0.01501 | -1.77246 |
| Hallmark Allograft rejection                      | -0.03222 | -1.72432 |
| Hallmark Inflammatory response                    | -0.03103 | -1.67556 |
| Hallmark Myogenesis                               | -0.02894 | -1.53371 |
| Hallmark Interferon gamma response                | -0.02399 | -1.40417 |
| Hallmark Hedgehog signaling                       | -0.01862 | -1.27624 |
| Hallmark MYC targets V1                           | 0.002062 | 1.120615 |
| Hallmark Adipogenesis                             | -0.00419 | -1.08714 |
| Hallmark UV response up                           | -0.00519 | -1.00149 |
| Hallmark Spermatogenesis                          | 0.00841  | 0.868797 |
| Hallmark TGF beta signaling                       | -0.00426 | -0.845   |
| Hallmark Protein secretion                        | -0.00358 | -0.83315 |
| Hallmark Estrogen response late                   | -0.00956 | -0.78128 |
| Hallmark Unfolded protein response                | 0.001376 | 0.517418 |
| Hallmark G2M checkpoint                           | -0.00198 | -0.44327 |
| Hallmark Notch signaling                          | -0.00383 | -0.43917 |
| Hallmark Fatty acid metabolism                    | -0.00228 | -0.38593 |
| Hallmark MYC targets V2                           | 0.001548 | 0.294404 |
| Hallmark E2F targets                              | -0.00129 | -0.25802 |
| Hallmark Complement                               | -0.00085 | -0.08051 |
| Hallmark DNA repair                               | -0.00012 | -0.03963 |

| P-value  | Adjusted p-value |
|----------|------------------|
| 1.70E-11 | 8.51E-10         |
| 3.94E-08 | 9.85E-07         |
| 4.67E-06 | 7.78E-05         |
| 0.000109 | 0.00136          |
| 0.000313 | 0.003132         |
| 0.000577 | 0.004808         |
| 0.001059 | 0.007567         |
| 0.001918 | 0.011988         |
| 0.003037 | 0.01559          |
| 0.003138 | 0.01559          |
| 0.00343  | 0.01559          |
| 0.004032 | 0.016801         |
| 0.006219 | 0.023919         |
| 0.009428 | 0.033671         |
| 0.010968 | 0.036561         |
| 0.011802 | 0.03688          |
| 0.01326  | 0.039            |
| 0.014594 | 0.040539         |
| 0.019089 | 0.050235         |
| 0.020964 | 0.052409         |
| 0.02234  | 0.053189         |
| 0.037262 | 0.079822         |
| 0.038288 | 0.079822         |
| 0.038315 | 0.079822         |
| 0.047613 | 0.095227         |
| 0.057817 | 0.107098         |
| 0.057833 | 0.107098         |
| 0.076412 | 0.133213         |
| 0.07752  | 0.133213         |
| 0.079928 | 0.133213         |
| 0.088311 | 0.142437         |
| 0.097526 | 0.152384         |
| 0.128842 | 0.195216         |
| 0.163939 | 0.241086         |
| 0.205371 | 0.293387         |
| 0.265631 | 0.368932         |
| 0.280072 | 0.378476         |
| 0.319454 | 0.420335         |
| 0.387422 | 0.496476         |
| 0.400502 | 0.496476         |
| 0.40711  | 0.496476         |
| 0.436824 | 0.520028         |
| 0.606218 | 0.704905         |
| 0.658705 | 0.735177         |
| 0.661659 | 0.735177         |
| 0.700523 | 0.761438         |
| 0.769172 | 0.818269         |
| 0.797018 | 0.830227         |
| 0.936019 | 0.955122         |
| 0.968483 | 0.968483         |
